# Supplementary material for: Effects of Ag-embedment on electronic and ionic conductivities of LiMnPO4and its performance as a cathode for lithium-ion batteries
Source: Royal Society of Chemistry journal article supplement (doi:10.1039/c5nr00933b), 2015-01-01
Supplement: c5nr00933b1.pdf [file c5nr00933b1.pdf]

## Electronic Supplementary Information

### Effects of Ag-Embedment on electronic and ionic conductivities of LiMnPO<sub>4</sub> and performances as a cathode for lithium-ion batteries

Kug-Seung Lee,<sup>a</sup> Kyung Jae Lee,<sup>b</sup> Yun Sik Kang,<sup>b</sup> Tae Joo Shin,<sup>a</sup> Yung-Eun Sung<sup>b</sup> and Docheon Ahn<sup>\*a</sup>

<sup>a</sup> *Beamline Department, Pohang Accelerator Laboratory (PAL), Pohang 790-784, Republic of Korea*

<sup>b</sup> *School of Chemical and Biological Engineering, Seoul National University, Seoul 151-742, Republic of Korea*

\* Corresponding author. Tel.: +82-54-279-1527; fax: +82-54-279-1599. (D. Ahn)

*E-mail address:* adc4055@postech.ac.kr (D. Ahn).

**Table S1.** CHN analyses results of LMP and Ag-embedded LMP samples (EA-1110, Thermo Quest)

| Sample Name     | Carbon | Hydrogen | Nitrogen |
|-----------------|--------|----------|----------|
| LMP             | 3.236  | 0.208    | 0.414    |
| Ag-embedded LMP | 3.995  | 0.132    | 0.406    |

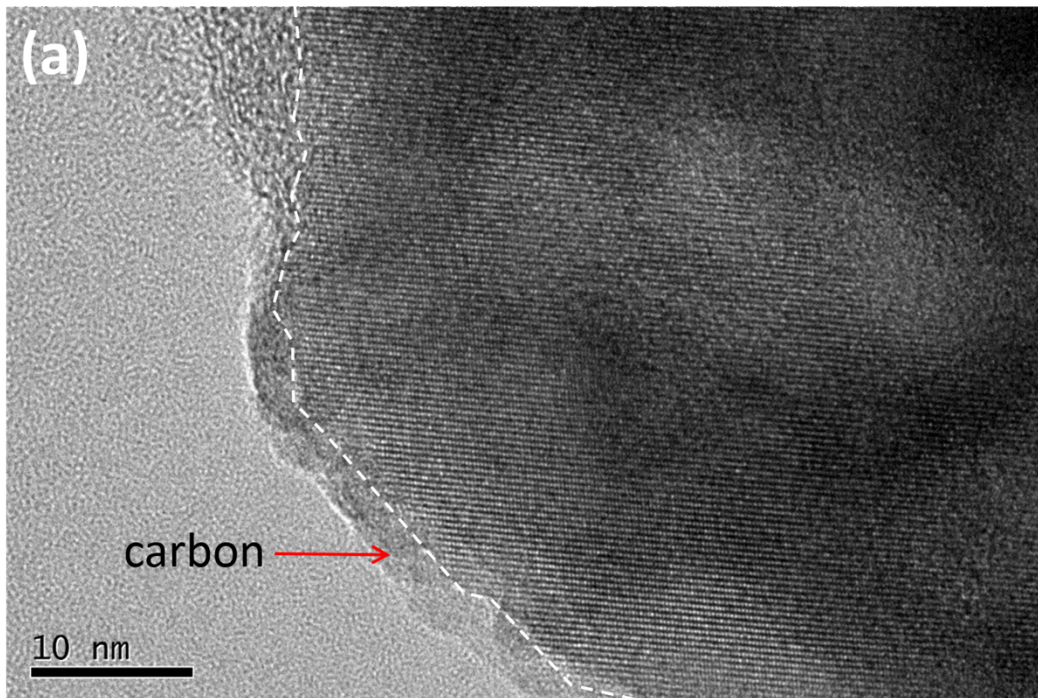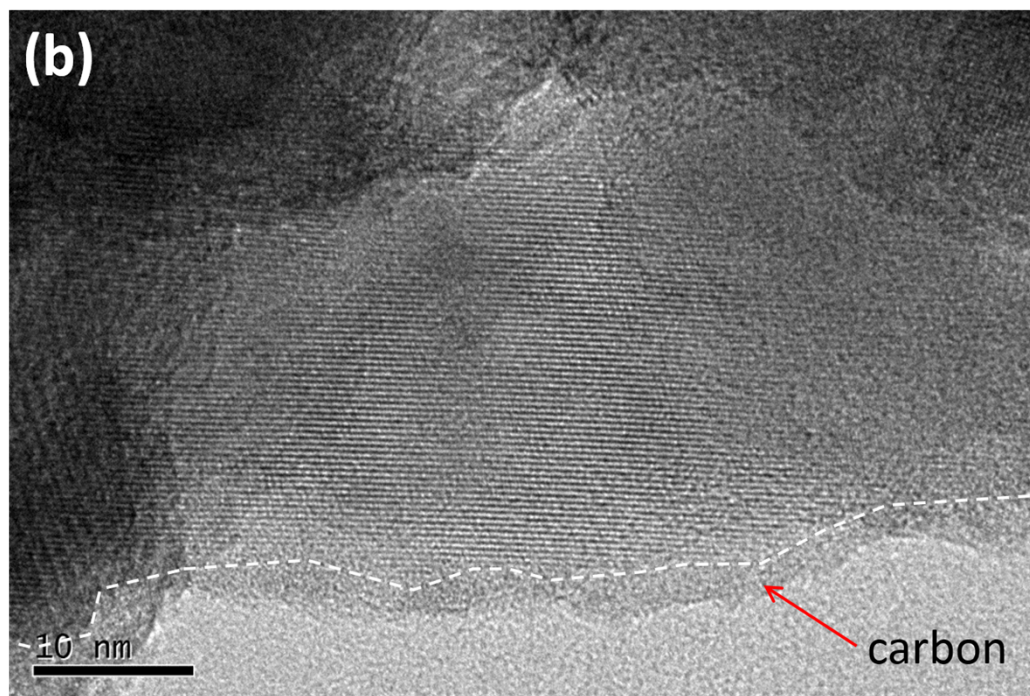

**Figure S1.** HR-TEM images of (a) pristine and (b) Ag-embedded LMPs. White guide lines indicate the border of LMP and carbon.
